# Supplementary material for: Does Zn-mediated regulation of the kynurenine pathway provide the link between periodontal disease and diabetes?
Source: Research Square preprint supplement (doi:10.21203/rs.3.rs-6641065/v1), 2025-05-16
Supplement: Supplementary file 1 [file 3b5d537677dabb24a4d5f032.docx]

|  | Control | TQ | LPS | LPS+TQ |
| --- | --- | --- | --- | --- |
| Fasting Blood Glucose Levels (mg/dl) | 83 ± 2.996 | 93 ± 3.270 | 116 ± 2.539***### | 114 ± 3.190***### |
| Plasma Insulin Levels (IU/L) | 30.364±1.762 | 21.494±0.881* | 37.470±3.542### | 43.648±0.791***### |
| HOMA-IR Levels | 6.266±0.392 | 4.982±0.288 | 10.734±0.868***### | 12.362±0.422***### |
| HOMA-β Levels (%) | 589 ±87.744 | 270±40.051** | 257±35.838** | 310±19.468** |

**TABLE 2**

**Evaluation of glucose homeostasis between groups**

Statistical analysis was done using a one-way analysis of variance (ANOVA) followed by Tukey’s Post Hoc Test. All values are mean ± SEM. n=6 for each group *, p<0,05 vs control; **, p<0,01 vs control; ***, p<0,001 vs control; #, p<0,05 vs. TQ; ##, p<0,001 vs. TQ; ###, p<0,000 vs. TQ, Ɛ, p<0,05 vs LPS; ƐƐ, p<0,01 vs LPS; ƐƐƐ, p<0,001 vs LPS.
