# Supplementary material for: Does Zn-mediated regulation of the kynurenine pathway provide the link between periodontal disease and diabetes?
Source: Research Square preprint supplement (doi:10.21203/rs.3.rs-6641065/v1), 2025-05-16
Supplement: Supplementary file 2 [file 99f79bf2a89fede72ccc6310.docx]

**TABLE 2**

**Histopathological scores of pancreatic injury**

| Parameters | Control | TQ | LPS | LPS+TQ |
| --- | --- | --- | --- | --- |
|  | Median  (25-75) | Median  (25-75) | Median  (25-75) | Median  (25-75) |
| Total score | 0 (0-0) | 3 (2-3) | 0 (0-1)* | 2 (2-2)*#Ɛ |

Statistical analysis was done by Kruskal Wallis's One-Way Analysis of Variance on Ranks. All pairwise multiple comparison procedures were done using the Mann-Whitney U test. All values are mean ± SEM and n=6 for each group.*, p<0,05 vs control; #, p<0,05 vs TQ; Ɛ, p<0,05 vs LPS.
