# Supplementary material for: Does Zn-mediated regulation of the kynurenine pathway provide the link between periodontal disease and diabetes?
Source: Research Square preprint supplement (doi:10.21203/rs.3.rs-6641065/v1), 2025-05-16
Supplement: Supplementary file 3 [file ce6be54970d65f1347a718b5.docx]

|  | Control | TQ | LPS | LPS+TQ |
| --- | --- | --- | --- | --- |
| Plasma Zn Levels  (µg/dL) | 81.715±1.095 | 66.175±0.817* | 53.514±3.937*** | 102.475±5.188*###ƐƐƐ |
| Pancreas Zn Levels (µg/mg protein) | 5.690±0.117 | 3.655±0.154*** | 7.155±0.415** | 3.063±0.223***ƐƐƐ |
| Pancreas ZIP-10 Levels (ng/g protein) | 83.069±3.548 | 57.300±3.656* | 120.780±4.027***### | 66.234±5.106*ƐƐƐ |
| Pancreas IFN-γ  levels (ng/g protein) | 5.367±0.576 | 13.635±3.431 | 9.275±1.969* | 16.347±4.710* |
| Pancreas Caspase- 3 Levels (ng/mg protein) | 0.874 ± 0.327 | 0.841 ± 0.348 | 0.185 ± 0.021* | 0.673 ± 0.2260 |

**TABLE 1**

**Evaluation of cytokine, caspase-3, and Zn related paratameters between groups**

Statistical analysis was done using Kruskal Wallis's One Way Analysis of Variance on Ranks. All pairwise multiple comparison procedures were done using the Mann-Whitney U test for analysis IFN-γ, and caspase 3 levels. Statistical analysis was performed using a one-way analysis of variance (ANOVA) followed by the Tukey post hoc test for analaysis of Zn and ZIP10 levels in the pancreas tissue, and Zn levels in tle plasma samples. All values are mean ± SEM. n=6 for each group . *, p<0,05 vs control; **, p<0,01 vs control; ***, p<0,001 vs control; #, p<0,05 vs. TQ; ##, p<0,001 vs. TQ; ###, p<0,000 vs. TQ, Ɛ, p<0,05 vs LPS; ƐƐ, p<0,01 vs LPS; ƐƐƐ, p<0,001 vs LPS.

**Abbreviations: IFN-γ**, interferon-γ; **Zn,** zinc
